# Supplementary material for: Variation in HIV care and treatment outcomes by facility in South Africa, 2011–2015: A cohort study
Source: PubMed Central journal article supplement (PMC8012100; doi:10.1371/journal.pmed.1003479), 2021-03-31
Supplement: pmed.1003479.s002.pdf [file pmed.1003479.s002.pdf]

**S1 Fig.** Exclusion flowchart

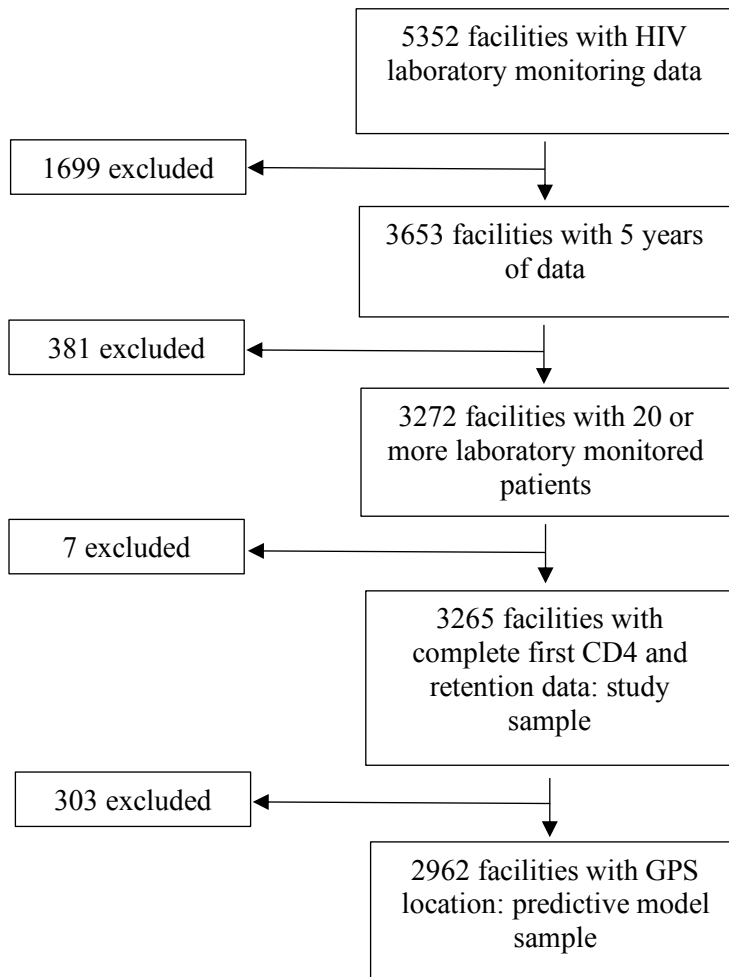

Supporting information for: **Bor J, Gage A, et al. Variation in HIV care and treatment outcomes by facility in South Africa, 2011-2015: a cohort study. *PLOS Medicine*.**
