# Supplementary material for: Variation in HIV care and treatment outcomes by facility in South Africa, 2011–2015: A cohort study
Source: PubMed Central journal article supplement (PMC8012100; doi:10.1371/journal.pmed.1003479), 2021-03-31
Supplement: pmed.1003479.s003.pdf [file pmed.1003479.s003.pdf]

**S2 Fig.** Geographic variation in adjusted quality score (left) and changes in quality over time (right), 2011-2015

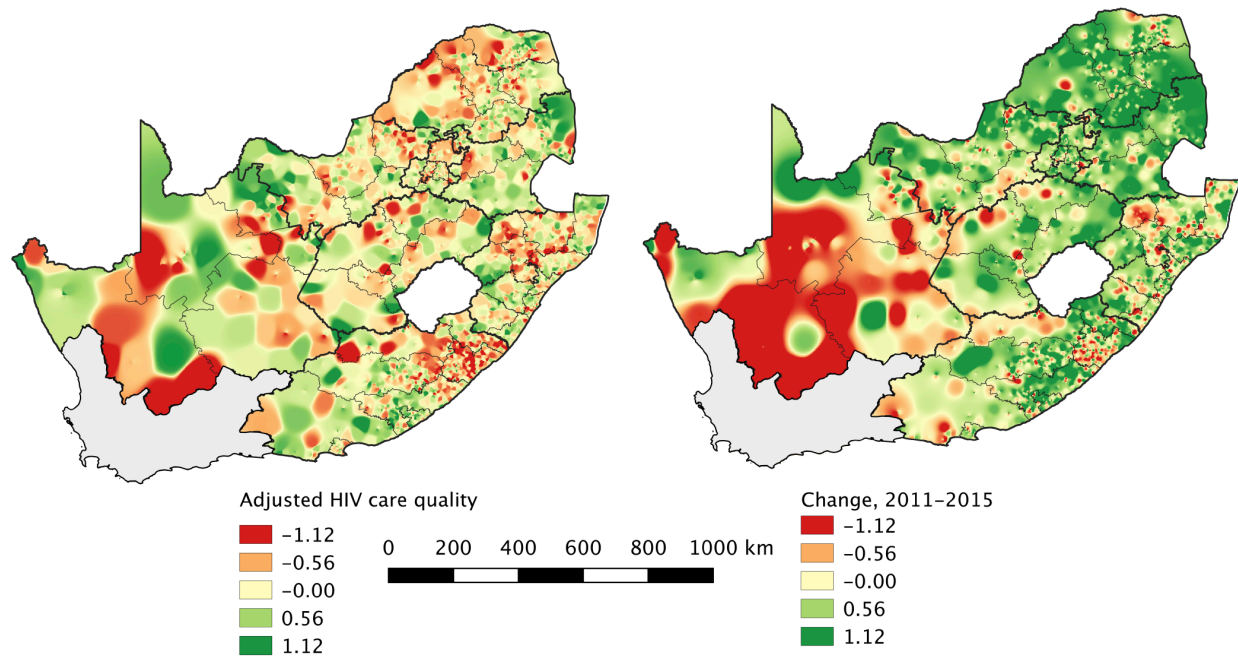

Note: Base map was obtained from the South African Municipal Demarcation Board (<http://www.demarcation.org.za/>).

Supporting information for: Bor J, Gage A, et al. Variation in HIV care and treatment outcomes by facility in South Africa, 2011-2015: a cohort study. *PLOS Medicine*.
