# Supplementary material for: Variation in HIV care and treatment outcomes by facility in South Africa, 2011–2015: A cohort study
Source: PubMed Central journal article supplement (PMC8012100; doi:10.1371/journal.pmed.1003479), 2021-03-31
Supplement: pmed.1003479.s004.pdf [file pmed.1003479.s004.pdf]

**S1 Table.** HIV quality indicators for all observed facilities<sup>a</sup>

| Year                                |              | 2011  | 2012  | 2013  | 2014  | 2015  |
|-------------------------------------|--------------|-------|-------|-------|-------|-------|
| Median first CD4 count              | Mean         | 311.9 | 307.7 | 310.1 | 312.2 | 325.3 |
|                                     | SD           | 94.1  | 88.6  | 94.4  | 85.3  | 95.3  |
|                                     | N facilities | 4,356 | 4,573 | 4,603 | 4,309 | 4,269 |
| Retention 0-350                     | Mean         | 0.409 | 0.417 | 0.433 | 0.450 | 0.465 |
|                                     | SD           | 0.169 | 0.180 | 0.182 | 0.181 | 0.205 |
|                                     | N facilities | 4,161 | 4,328 | 4,232 | 4,086 | 3,937 |
| Retention 350+                      | Mean         | 0.354 | 0.349 | 0.354 | 0.370 | 0.399 |
|                                     | SD           | 0.174 | 0.172 | 0.162 | 0.164 | 0.194 |
|                                     | N facilities | 4,161 | 4,333 | 4,255 | 4,118 | 3,995 |
| Retention in care                   | Mean         | 0.774 | 0.763 | 0.770 | 0.765 | 0.719 |
|                                     | SD           | 0.129 | 0.132 | 0.132 | 0.127 | 0.172 |
|                                     | N facilities | 4,281 | 4,522 | 4,552 | 4,282 | 4,235 |
| Viral suppression                   | Mean         | 0.672 | 0.727 | 0.730 | 0.753 | 0.780 |
|                                     | SD           | 0.263 | 0.213 | 0.192 | 0.168 | 0.156 |
|                                     | N facilities | 3,483 | 3,918 | 4,209 | 4,063 | 4,095 |
| CD4 recovery                        | Mean         | 0.384 | 0.476 | 0.577 | 0.602 | 0.587 |
|                                     | SD           | 0.197 | 0.187 | 0.171 | 0.168 | 0.167 |
|                                     | N facilities | 4,094 | 4,309 | 4,247 | 4,128 | 4,076 |
| Viral monitoring after unsuppressed | Mean         | 0.229 | 0.242 | 0.272 | 0.311 | 0.373 |
|                                     | SD           | 0.221 | 0.205 | 0.205 | 0.195 | 0.198 |
|                                     | N facilities | 3,171 | 3,678 | 3,991 | 3,924 | 3,940 |

<sup>a</sup>Excluding Western Cape province facilities. S1 Table replicates Table 1, but shows data for all facilities rather than the balanced panel 3265 facilities included in the analysis.

Supporting information for: Bor J, Gage A, et al. Variation in HIV care and treatment outcomes by facility in South Africa, 2011-2015: a cohort study. *PLOS Medicine*.
