# Supplementary material for: Variation in HIV care and treatment outcomes by facility in South Africa, 2011–2015: A cohort study
Source: PubMed Central journal article supplement (PMC8012100; doi:10.1371/journal.pmed.1003479), 2021-03-31
Supplement: pmed.1003479.s005.pdf [file pmed.1003479.s005.pdf]

**S2 Table.** HIV quality indicators using 4 year panel of 3,440 facilities, 2012-2015

|                                   | Median<br>first CD4<br>count | Retention<br>after first<br>CD4 0-350 | Retention<br>after first<br>CD4 350+ | Retention<br>starting 6<br>mo after<br>CD4 | Viral<br>suppression | CD4<br>recovery | Factor 1 |
|-----------------------------------|------------------------------|---------------------------------------|--------------------------------------|--------------------------------------------|----------------------|-----------------|----------|
| Median first CD4 count            | 1                            |                                       |                                      |                                            |                      |                 | -0.0942  |
| Retention after first CD4 0-350   | 0.0150                       | 1                                     |                                      |                                            |                      |                 | 0.6654   |
| Retention after first CD4 350+    | 0.0615                       | 0.4951                                | 1                                    |                                            |                      |                 | 0.5532   |
| Retention starting 6 mo after CD4 | -0.0999                      | 0.5057                                | 0.4028                               | 1                                          |                      |                 | 0.6549   |
| Viral suppression                 | -0.1618                      | 0.1878                                | 0.0971                               | 0.2110                                     | 1                    |                 | 0.3814   |
| CD4 recovery                      | -0.2093                      | 0.1192                                | 0.0576                               | 0.1631                                     | 0.3400               | 1               | 0.2850   |
| Monitoring after unsuppressed     | 0.0119                       | 0.2049                                | 0.1572                               | 0.2696                                     | 0.2445               | 0.0844          | 0.3618   |

Supporting information for: Bor J, Gage A, et al. Variation in HIV care and treatment outcomes by facility in South Africa, 2011-2015: a cohort study. *PLOS Medicine*.
