# Supplementary material for: Variation in HIV care and treatment outcomes by facility in South Africa, 2011–2015: A cohort study
Source: PubMed Central journal article supplement (PMC8012100; doi:10.1371/journal.pmed.1003479), 2021-03-31
Supplement: pmed.1003479.s006.pdf [file pmed.1003479.s006.pdf]

**S3 Table.** Factor loadings of HIV care quality in 3253 facilities

| Variable                          | Factor1 | Factor2 | Factor 3 | Uniqueness |
|-----------------------------------|---------|---------|----------|------------|
| Median first CD4 count            | -0.046  | -0.341  | 0.138    | 0.863      |
| Retention after first CD4 0-350   | 0.675   | -0.187  | -0.031   | 0.509      |
| Retention after first CD4 350+    | 0.580   | -0.257  | -0.018   | 0.597      |
| Retention starting 6 mo after CD4 | 0.637   | -0.098  | -0.041   | 0.583      |
| Viral suppression                 | 0.343   | 0.437   | 0.048    | 0.689      |
| CD4 recovery                      | 0.269   | 0.456   | -0.018   | 0.719      |
| Monitoring after unsuppressed     | 0.357   | 0.138   | 0.145    | 0.833      |
| Eigenvalue                        | 1.517   | 0.644   | 0.045    |            |

Supporting information for: Bor J, Gage A, et al. Variation in HIV care and treatment outcomes by facility in South Africa, 2011-2015: a cohort study. *PLOS Medicine*.
