# Supplementary material for: Variation in HIV care and treatment outcomes by facility in South Africa, 2011–2015: A cohort study
Source: PubMed Central journal article supplement (PMC8012100; doi:10.1371/journal.pmed.1003479), 2021-03-31
Supplement: pmed.1003479.s007.pdf [file pmed.1003479.s007.pdf]

**S4 Table. Characteristics of 207 municipalities**

| Variable                      | Mean  | Std. Dev. | Min   | Max   |
|-------------------------------|-------|-----------|-------|-------|
| % households in poverty       | 0.376 | 0.106     | 0.171 | 0.620 |
| % households with piped water | 0.642 | 0.274     | 0.063 | 0.981 |
| % households with electricity | 0.789 | 0.153     | 0.145 | 0.969 |
| % population over 60          | 0.086 | 0.020     | 0.037 | 0.164 |
| % population literate         | 0.781 | 0.072     | 0.582 | 0.954 |
| % households moved            | 0.119 | 0.063     | 0.015 | 0.423 |
| % households with internet    | 0.255 | 0.075     | 0.105 | 0.513 |
| % majority black households   | 0.820 | 0.241     | 0.028 | 1.000 |

Supporting information for: Bor J, Gage A, et al. Variation in HIV care and treatment outcomes by facility in South Africa, 2011-2015: a cohort study. *PLOS Medicine*.
