# Supplementary material for: Variation in HIV care and treatment outcomes by facility in South Africa, 2011–2015: A cohort study
Source: PubMed Central journal article supplement (PMC8012100; doi:10.1371/journal.pmed.1003479), 2021-03-31
Supplement: pmed.1003479.s008.pdf [file pmed.1003479.s008.pdf]

**S5 Table.** Full model predictors of HIV care quality, 2962 facilities

|                                 | Bivariate models |               | Multivariable model |               |
|---------------------------------|------------------|---------------|---------------------|---------------|
|                                 | Beta             | 95% CI        | Beta                | 95% CI        |
| Facility characteristics        |                  |               |                     |               |
| log N patients                  | 0.14             | (0.11,0.16)   | 0.12                | (0.10,0.14)   |
| Facility type (clinic ref.)     |                  |               |                     |               |
| District or CHC                 | -0.83            | (-0.92,-0.75) | -0.93               | (-1.01,-0.84) |
| Provincial or national hospital | -1.08            | (-1.20,-0.96) | -1.13               | (-1.25,-1.01) |
| Municipality characteristics    |                  |               |                     |               |
| Rural                           | 0.15             | (0.07,0.24)   | 0.14                | (0.07,0.22)   |
| % households in poverty         | 0.02             | (-0.04,0.09)  | -0.09               | (-0.21,0.03)  |
| % majority black households     | 0.02             | (-0.03,0.07)  | -0.01               | (-0.09,0.06)  |
| % population over 60            | 0.04             | (-0.03,0.10)  | 0.15                | (0.09,0.22)   |
| % population literate           | 0.02             | (-0.06,0.10)  | -0.05               | (-0.15,0.05)  |
| % households moved              | -0.05            | (-0.11,0.01)  | -0.04               | (-0.12,0.04)  |
| % households with internet      | 0.07             | (-0.01,0.15)  | 0.03                | (-0.09,0.15)  |
| % households with piped water   | -0.02            | (-0.09,0.04)  | 0.05                | (-0.06,0.16)  |
| % households with electricity   | -0.06            | (-0.13,0.00)  | 0.05                | (-0.02,0.13)  |
| Province (Eastern Cape ref)     |                  |               |                     |               |
| Free State                      | 0.26             | (-0.10,0.53)  | 0.07                | (-0.16,0.31)  |
| Gauteng                         | 0.26             | (-0.07,0.59)  | 0.20                | (-0.09,0.50)  |
| KwaZulu-Natal                   | 0.64             | (0.45,0.83)   | 0.64                | (0.47,0.82)   |
| Limpopo                         | -0.13            | (-0.34,0.09)  | -0.21               | (-0.40,-0.02) |
| Mpumalanga                      | -0.21            | (-0.44,0.02)  | -0.19               | (-0.39,0.01)  |
| North West                      | 0.01             | (-0.24,0.26)  | -0.13               | (-0.34,0.08)  |
| Northern Cape                   | -0.08            | (-0.35,0.20)  | -0.24               | (-0.50,0.03)  |
| Year (2011 ref)                 |                  |               |                     |               |
| 2012                            | 0.11             | (0.08,0.14)   | 0.09                | (0.06,0.12)   |
| 2013                            | 0.33             | (0.30,0.36)   | 0.30                | (0.27,0.33)   |
| 2014                            | 0.48             | (0.45,0.52)   | 0.44                | (0.40,0.47)   |
| 2015                            | 0.55             | (0.51,0.59)   | 0.49                | (0.46,0.53)   |
| Constant                        |                  |               | -1.03               | (-1.21,-0.84) |

Supporting information for: Bor J, Gage A, et al. Variation in HIV care and treatment outcomes by facility in South Africa, 2011-2015: a cohort study. *PLOS Medicine*.
