# Supplementary material for: Variation in HIV care and treatment outcomes by facility in South Africa, 2011–2015: A cohort study
Source: PubMed Central journal article supplement (PMC8012100; doi:10.1371/journal.pmed.1003479), 2021-03-31
Supplement: pmed.1003479.s009.pdf [file pmed.1003479.s009.pdf]

**S6 Table.** Predictors of HIV quality using 4 year panel of 3,116 facilities

|                                 | Coef. | [95% CI]      |
|---------------------------------|-------|---------------|
| Facility characteristics        |       |               |
| log N patients                  | 0.12  | (0.10,0.14)   |
| Facility type (clinic ref.)     |       |               |
| District or CHC                 | -1.00 | (-1.09,-0.91) |
| Provincial or national hospital | -1.13 | (-1.25,-1.00) |
| Municipality characteristics    |       |               |
| Rural                           | 0.11  | (0.04,0.19)   |
| % households in poverty         | -0.10 | (-0.17,-0.02) |
| % majority black households     | -0.01 | (-0.08,0.07)  |
| % population over 60            | 0.16  | (0.10,0.21)   |
| Province (Eastern Cape ref)     |       |               |
| Free State                      | 0.23  | (0.01,0.44)   |
| Gauteng                         | 0.25  | (-0.03,0.53)  |
| KwaZulu-Natal                   | 0.56  | (0.39,0.73)   |
| Limpopo                         | -0.06 | (-0.25,0.12)  |
| Mpumalanga                      | -0.03 | (-0.23,0.17)  |
| North West                      | -0.08 | (-0.28,0.11)  |
| Northern Cape                   | -0.25 | (-0.51,0.01)  |
| Year (2012 ref)                 |       |               |
| 2013                            | 0.21  | (0.18,0.23)   |
| 2014                            | 0.35  | (0.32,0.38)   |
| 2015                            | 0.38  | (0.35,0.42)   |
| Constant                        | -1.00 | (-1.19,-0.82) |

Supporting information for: Bor J, Gage A, et al. Variation in HIV care and treatment outcomes by facility in South Africa, 2011-2015: a cohort study. *PLOS Medicine*.
